# Supplementary material for: High-Frequency Cochlear Amplifier Dysfunction: A Dominating Contribution to the Cognitive-Ear Link
Source: Frontiers journal article supplement (doi:10.3389/fnagi.2021.767570), 2022-01-06
Supplement: Data_Sheet_1.PDF [file Data_Sheet_1.PDF]

## *Supplementary Material*

### **High-frequency Cochlear Amplifier Dysfunction: a Dominating Contribution to the Cognitive-ear Link**

**Yao Wang<sup>†</sup>, Xiao Li<sup>†</sup>, Fuxin Ren, Siqi Liu, Wen Ma, Yue Zhang, Zhihang Qi, Jing Yang, Honghao Li, Xinxing Fu, Huiquan Wang\* and Fei Gao\***

**<sup>†</sup>These authors have contributed equally to this work and share first authorship.**

**\*These authors have contributed equally to this work and share corresponding authorship.**

Fei Gao

[feigao@email.sdu.edu.cn](mailto:feigao@email.sdu.edu.cn)

Huiquan Wang

[huiquan@tiangong.edu.cn](mailto:huiquan@tiangong.edu.cn)

**Supplementary Table 1.** Inclusion and exclusion criteria defined for participants in this study

| <b>PATHOLOGY</b>                                                                                                                                                   | <b>INCLUSION OR EXCLUSION</b>                          |
|--------------------------------------------------------------------------------------------------------------------------------------------------------------------|--------------------------------------------------------|
| <b>AUDIOLOGICAL AND CLINICAL OTOLOGICAL PATHOLOGIES</b>                                                                                                            |                                                        |
| Ear disease other than presbycusis                                                                                                                                 | Exclude                                                |
| Subjects with cochlear implant                                                                                                                                     | Exclude                                                |
| 1) <u>Clinical criteria</u>                                                                                                                                        |                                                        |
| a. One or both tympanic membranes scored as acute otitis media, inactive chronic otitis media or active chronic otitis                                             | Exclude                                                |
| b. Syndromic features of congenital otological abnormalities                                                                                                       | Exclude                                                |
| 2) <u>Sensorineural hearing impairment</u>                                                                                                                         |                                                        |
| a. Menière disease                                                                                                                                                 | Exclude                                                |
| b. VIII nerve tumor                                                                                                                                                | Exclude                                                |
| c. Ramsay hunt syndrome                                                                                                                                            | Exclude                                                |
| d. Post-meningitis                                                                                                                                                 | Exclude                                                |
| e. All sudden losses                                                                                                                                               | Exclude                                                |
| f. Other genetic hearing loss                                                                                                                                      | Exclude                                                |
| 3) <u>Audiological criteria</u>                                                                                                                                    |                                                        |
| a. Conductive hearing loss, air-bone gap averaged over 0.5,1,2 kHz of >15 dB in one or both ears                                                                   | Exclude                                                |
| b. Assymmetrical hearing loss, difference between left and right ear air conduction thresholds of $\geq 20$ dB for at least 2 frequencies out of 0.5, 1, and 2 kHz | Exclude                                                |
| <b>GENERAL PATHOLOGIES</b>                                                                                                                                         |                                                        |
| 1) <u>Cardiovascular disease</u>                                                                                                                                   |                                                        |
| a. Hypertension                                                                                                                                                    |                                                        |
| I. Primary                                                                                                                                                         | Include                                                |
| II. Adrenal hyperplasia                                                                                                                                            | Include                                                |
| b. Hypercholesterolemia                                                                                                                                            | Include, but note if high or low                       |
| 2) <u>Diabetes</u>                                                                                                                                                 |                                                        |
| a. Type I                                                                                                                                                          | Include, but carefully write down duration and therapy |
| b. Type II                                                                                                                                                         |                                                        |
| 3) <u>Neoplasms</u>                                                                                                                                                | Exclude                                                |
| 4) <u>Neurological disease</u>                                                                                                                                     | Exclude                                                |
| a. (Alzheimer) dementia                                                                                                                                            | Exclude                                                |
| b. Parkinson disease                                                                                                                                               | Exclude                                                |
| c. Multiple sclerosis                                                                                                                                              | Exclude                                                |
| d. Epilepsy                                                                                                                                                        | Exclude                                                |
| e. Migraine                                                                                                                                                        | Exclude                                                |
| f. Other                                                                                                                                                           | Exclude                                                |
| 5) <u>Psychiatric disease</u>                                                                                                                                      | Exclude                                                |
| 6) <u>Other subjects to exclude</u>                                                                                                                                |                                                        |
| a. All congenital syndromes (Down's syndrome etc.)                                                                                                                 | Exclude                                                |
| b. All rare diseases that are severe enough to cause significant handicap according to the subject                                                                 | Exclude                                                |

**Supplementary Table 2.** The component weights of the matrix after rotation

| Frequency(kHz) | Component 1 | Component 2 |
|----------------|-------------|-------------|
| 0.125          | 0.880       | 0.208       |
| 0.25           | 0.926       | 0.271       |
| 0.5            | 0.855       | 0.395       |
| 1              | 0.701       | 0.516       |
| 2              | 0.435       | 0.800       |
| 4              | 0.211       | 0.920       |
| 8              | 0.293       | 0.848       |

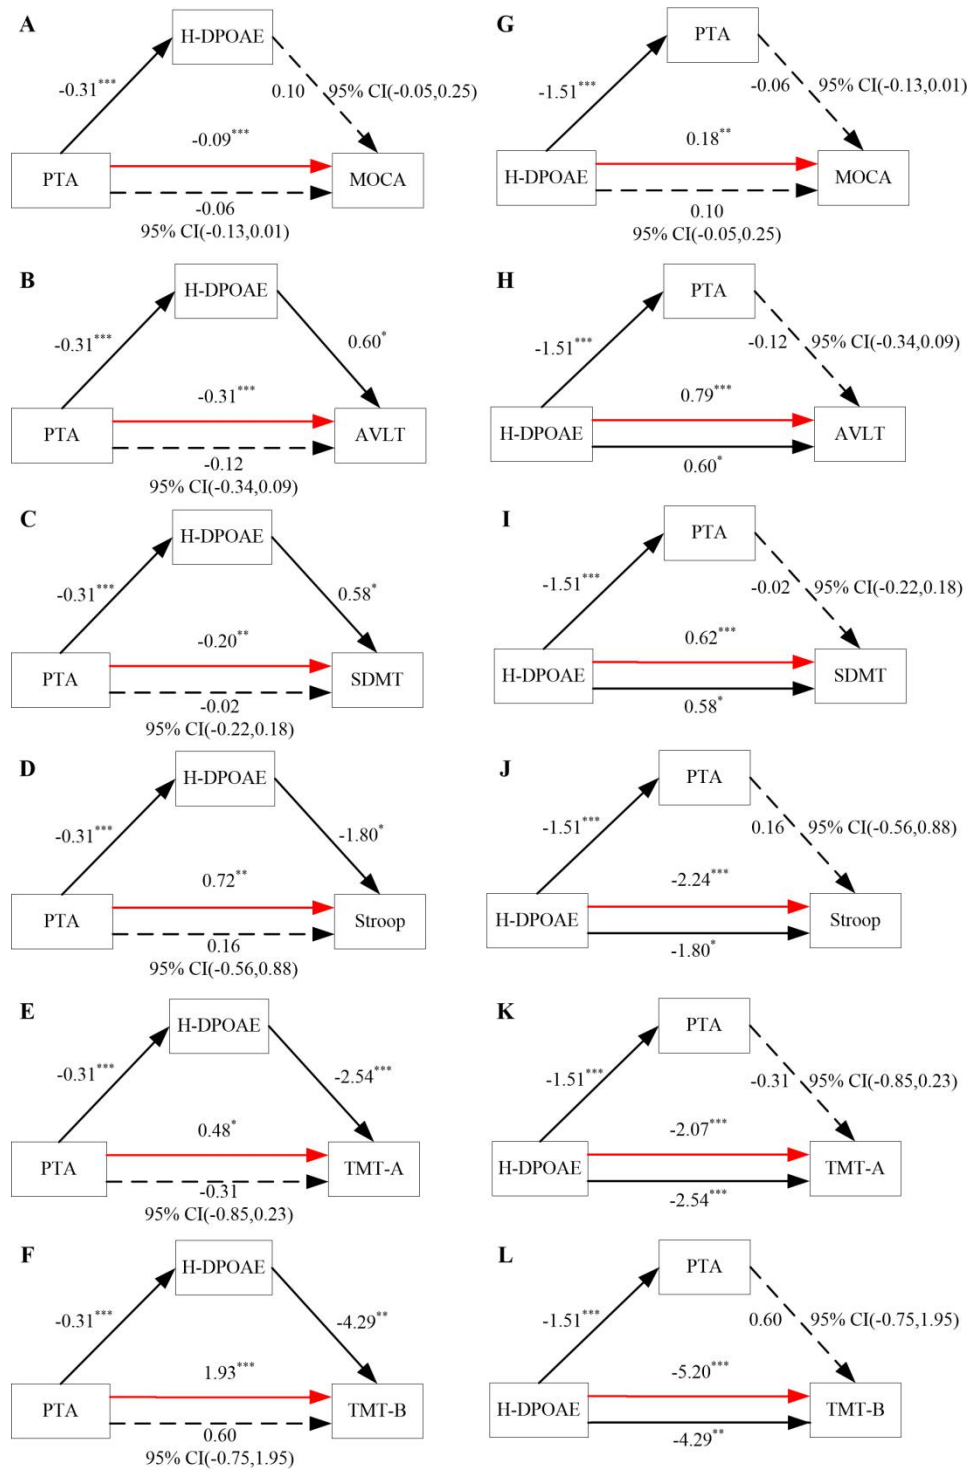

**Supplementary Figure 1.** Mediating analysis models of H-DPOAE and PTA on cognition in all participants. Left column shows mediation effect characteristics of H-DPOAE between PTA and cognitive tests (A~F), and right column shows mediation effect characteristics of PTA between H-DPOAE and cognitive tests (G~L). Unstandardized regression coefficients and confidence intervals are shown for each path ( $p < 0.05^*$ ,  $p < 0.01^{**}$ ,  $p < 0.001^{***}$ ). The solid line represents the path's significance, and the dashed line represents the path's insignificance. Red lines indicate total effect of the independent variables on dependent variables. The 95% CI indicate the confidence interval or range of values across which  $\beta$  would be expected to occur 95% of the time.

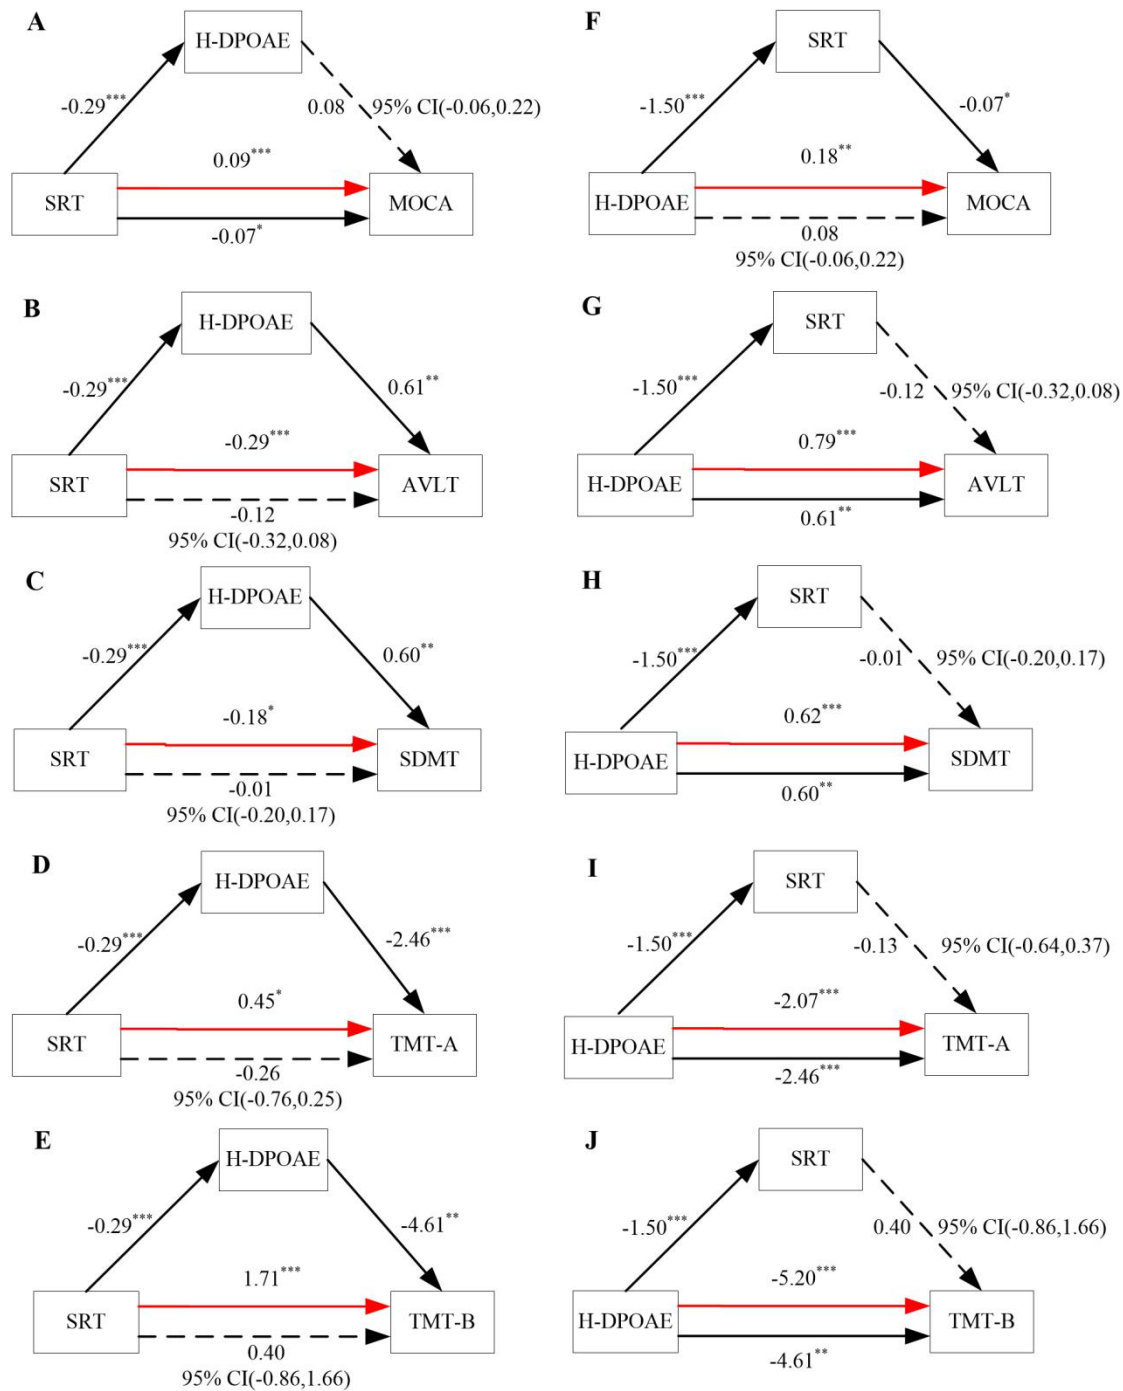

**Supplementary Figure 2.** Mediating analysis models of H-DPOAE and SRT on cognition in all participants. Left column shows mediation effect characteristics of H-DPOAE between SRT and cognitive tests (A~E), and right column shows mediation effect characteristics of SRT between H-DPOAE and cognitive tests (F~J). Unstandardized regression coefficients and confidence intervals are shown for each path ( $p < 0.05^*$ ,  $p < 0.01^{**}$ ,  $p < 0.001^{***}$ ). The solid line represents the path's significance, and the dashed line represents the path's insignificance. Red lines indicate gross effect of the independent variables on dependent variables. The 95% CI indicate the confidence interval or range of values across which  $\beta$  would be expected to occur 95% of the time.
